# Supplementary material for: Construction of ternary RuP2/Ti4P6O23@TiO2 photocatalysts for efficient photocatalytic biomass selective oxidation and water splitting
Source: Royal Society of Chemistry journal article supplement (doi:10.1039/d2tc04730f), 2023-01-01
Supplement: d2tc04730f1.pdf [file d2tc04730f1.pdf]

## Electronic Supplementary Information

### Construction of ternary $\text{RuP}_2/\text{Ti}_4\text{P}_6\text{O}_{23}@\text{TiO}_2$ photocatalyst for efficient photocatalytic biomass selective oxidation and water splitting

Xinze Li<sup>a#</sup>, Qiong Liu<sup>b#</sup>, Jiliang Ma<sup>a,c\*</sup>, Kangning Liu<sup>a</sup>, Zhendong Liu<sup>a</sup>, and Runcang Sun<sup>a\*</sup>

<sup>a</sup> Liaoning Key Lab of Lignocellulose Chemistry and BioMaterials, Liaoning Collaborative Innovation Center for Lignocellulosic Biorefinery, College of Light Industry and Chemical Engineering, Dalian Polytechnic University, Dalian 116034, China

<sup>b</sup> Institute of Analysis, Guangdong Academy of Sciences (China National Analytical Center, Guangzhou), Guangzhou, Guangdong, 510070, China

<sup>c</sup> Guangxi Key Laboratory of Clean Pulp & Papermaking and Pollution Control. College of Light Industrial and Food Engineering, Guangxi University, Nanning 530004, China

\*Corresponding authors' E-mail address: [jlma@dlpu.edu.cn](mailto:jlma@dlpu.edu.cn) (Jiliang Ma) and [rcsun3@dlpu.edu.cn](mailto:rcsun3@dlpu.edu.cn) (Runcang Sun), Tel.: +86-0411-86323652, Fax: +86-0411-86323652

## Chemicals

Tryptophan (Trp, 99.0%), potassium iodide (KI, 99.0%), benzoquinone (BQ, 99.0%), isopropyl (IPA, 99.0%), rhamnose (98.0%), xylose (98.0%), xylan (85.0%), arabinose (98.0%), mannose (98.0%), fructose (98.0%), glucose (98.0%), potassium hydroxide (KOH, 99.0%), and nano titanium dioxide (TiO<sub>2</sub>, 99.8%) were acquired from Aladdin Chemistry Co., Ltd (Shanghai, China). Sodium hypophosphite (NaH<sub>2</sub>PO<sub>2</sub>, 98.0%) and ruthenium trichloride (RuCl<sub>3</sub>, 45.0 ~ 55.0%) were obtained from Macklin biochemical Co., Ltd (Shanghai, China). Chloroplatinic acid hexahydrate (H<sub>2</sub>PtCl<sub>6</sub>·6H<sub>2</sub>O, ≥ 37.5% Pt basis), lactic acid (99.0%), formic acid (99.0%), and other chemicals were purchased from Dalian Chemical Reagent Factory, China.

## Characterization

Transmission electron microscopy (TEM) were recorded on JEM-2100 CXII and scanning electron microscopy (SEM) were explored on Hitachi-4800. The powder X-ray diffraction (XRD) patterns were measured with a Bruker D8 Focus diffractometer (CuK $\alpha$  radiation,  $\lambda = 0.15418$  nm) in the  $\theta$ - $2\theta$  mode. Brunauer-Emmett-Teller (BET) specific surface areas were measured on a Micromeritics ASAP 2020 apparatus. The X-ray photoelectron spectroscopy (XPS) analysis was performed with a Kratos Axis Ultra DLD spectrometer employing an amonochromated AlK $\alpha$  X-ray source (1486.6 eV). The ultraviolet-visible diffuse reflectance spectrum (UV-vis DRS) was achieved on a Cary 5000 spectrophotometer by using BaSO<sub>4</sub> as the reference. The photoluminescence (PL) spectrum was measured by an Edinburgh

FLS-920 spectrometer. Electron spin-resonance spectroscopy was used to study molecules and materials with unpaired electrons, and the 5,5-dimethyl-1-pyrroline N-oxide (DMPO) was chosen as a spin trap for the detection of hydroxyl radical ( $\cdot\text{OH}$ ) and superoxide ( $\cdot\text{O}_2^-$ ), the 2,2,6,6-tetramethylpiperidine-1-oxyl (TEMPO) was applied to characterize electrons and holes, while the amino-2,2,6,6-tetramethylpiperidine (TEMPONE) was used to detect singlet oxygen. Ultraviolet photoelectron spectroscopy (UPS) was measured by using a He I (21.20 eV) as monochromatic discharge light source and a VG Scienta R4000 analyzer. A sample bias of -5 V was applied to observe the secondary electron cutoff (SEC).

## **Photoelectrochemical Measurements**

Electrochemical measurements were carried out on a CHI760E electrochemical workstation with a stand three-electrodes system. Among them, a Pt wire was used as the counter electrode, and the reference electrode was the saturated Ag/AgCl. The cleaned F-doped tin oxide (FTO) glass was used as the working electrode. 5 mg of corresponding photocatalyst and 20  $\mu\text{L}$  of Nafion (5%) were added into 980  $\mu\text{L}$  of ethanol to form a homogeneous slurry. The homogeneous slurry was ultrasonicated for 30 min and then coated on the FTO glass. The obtained system was dried at 150  $^\circ\text{C}$  for 60 min. The supporting electrolyte was  $\text{Na}_2\text{SO}_4$  solution (0.5 M) with the pH value of 6.8. The incident visible light source was Xe lamp (300 W). The photocurrent-time was investigated in the irradiation of Xe lamp at a bias potential of 0.5 V vs. Ag/AgCl. The electrochemical impedance spectroscopy (EIS) was detected by an AC voltage amplitude of 10 mV at -0.3 V versus Ag/AgCl over the frequency

range from 10 kHz to 0.01 Hz. The Mott-Schottky was studied in the electrolyte of Na<sub>2</sub>SO<sub>4</sub> (0.5 M), and the frequency of the AC potential was set as 500, 800, and 1000 Hz as well as the amplitude was 10 mV.

## **Products Analysis**

The photocatalytic performance was measured with the Perfectlight PCX 50C multi-channel photochemical reaction system under the illumination of 10 W LED lamps.

### **Hydrogen:**

The yield of hydrogen was analyzed by gas chromatography (GC-7900, Ar carrier gas, molecular sieve 5 Å column) equipped with a thermal conductivity detector (TCD).

### **Products of Oxidation Half-reaction:**

After the reaction, the samples were filtrated with a Millipore filter (0.22 μm) and analyzed by high-performance liquid chromatography (HPLC) with a Bio-Rad Aminex HPX-87H column (300 mm × 7.8 mm × 9 μm). Concentrations of lactic acid was measured by Waters 2414 RI detector. The mobile phase was 5 mmol H<sub>2</sub>SO<sub>4</sub> at a flow rate of 0.5 mL/min. The temperature of column was set at 55 °C and the total time to finish the product analysis was set at 30 min. The conversion and yields of oxidation half-reaction products were calculated as follows:

$$\text{Conversion (\%)} = \frac{\text{Moles of carbon in feedstock consumed}}{\text{Moles of carbon in feedstock input}} \times 100\%$$

$$\text{Product yield (\%)} = \frac{\text{Moles of carbon in organic acid}}{\text{Moles of carbon in feedstock input}} \times 100\%$$

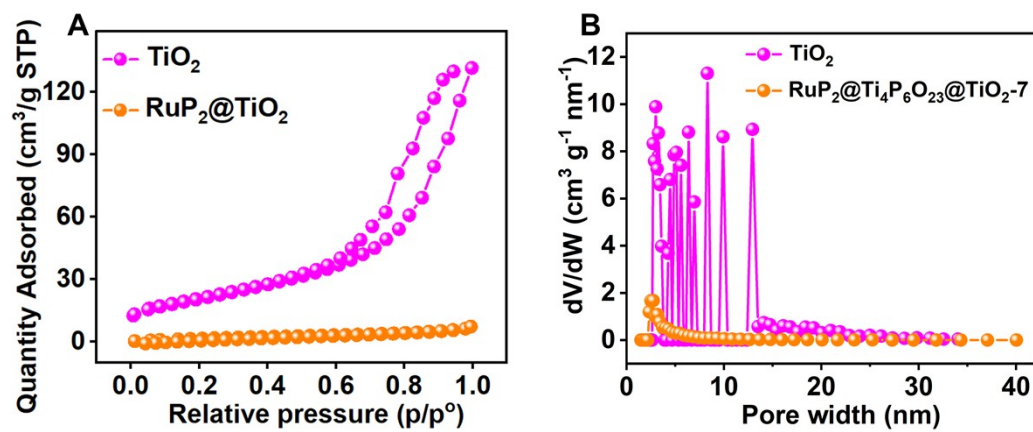

**Fig. S1** N<sub>2</sub> adsorption-desorption isotherm of TiO<sub>2</sub> and RuP<sub>2</sub>/Ti<sub>4</sub>P<sub>6</sub>O<sub>23</sub>@TiO<sub>2</sub>-7 (A). Pore width distribution of TiO<sub>2</sub> and RuP<sub>2</sub>/Ti<sub>4</sub>P<sub>6</sub>O<sub>23</sub>@TiO<sub>2</sub>-7 (B).

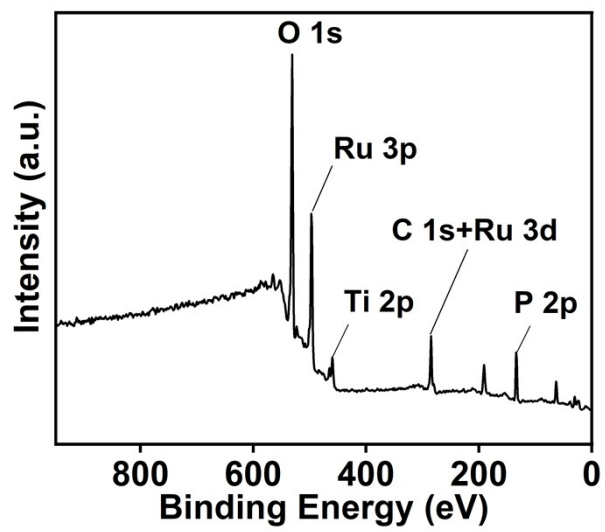

Fig. S2 XPS survey spectra of  $\text{RuP}_2/\text{Ti}_4\text{P}_6\text{O}_{23}@\text{TiO}_2$ -7.

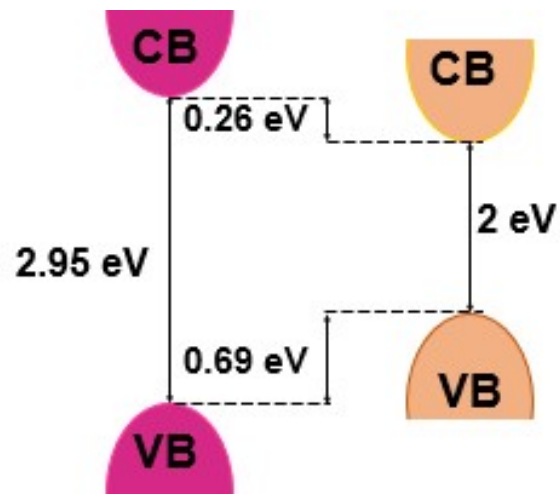

**Fig. S3** Relative band alignment of  $\text{TiO}_2$  and  $\text{RuP}_2/\text{Ti}_4\text{P}_6\text{O}_{23}@/\text{TiO}_2$ -7.

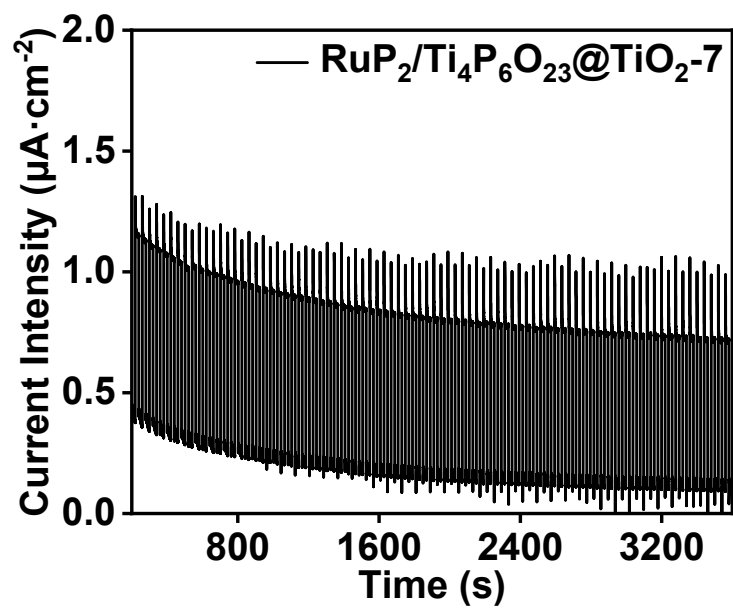

**Fig. S4** Long-term transient photocurrent response of RuP<sub>2</sub>/Ti<sub>4</sub>P<sub>6</sub>O<sub>23</sub>@TiO<sub>2</sub>-7.



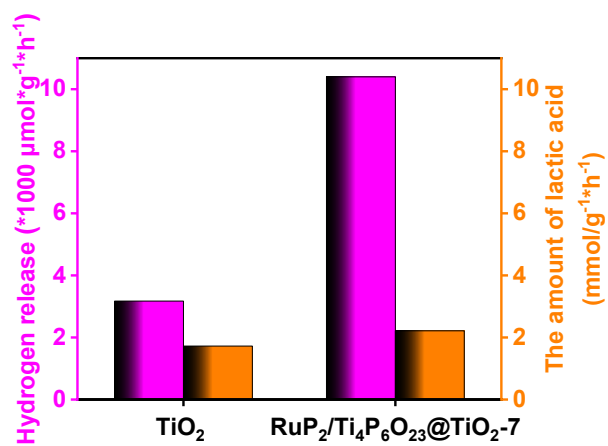

**Fig. S5** The effects of RuP<sub>2</sub> on the photocatalytic synchronous biorefinery and hydrogen evolution.

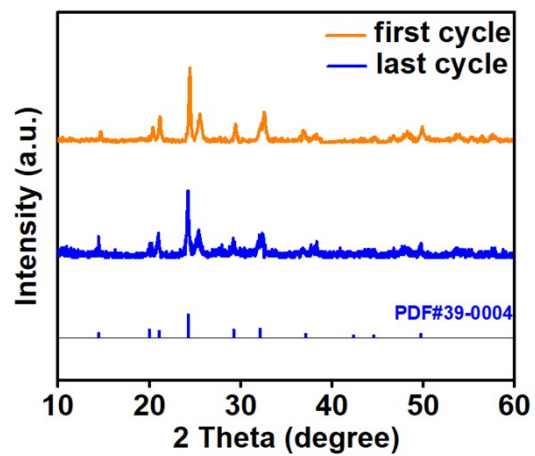

**Fig. S6** The first cycle and last cycle XRD of RuP<sub>2</sub>/Ti<sub>4</sub>P<sub>6</sub>O<sub>23</sub>@TiO<sub>2</sub>-7

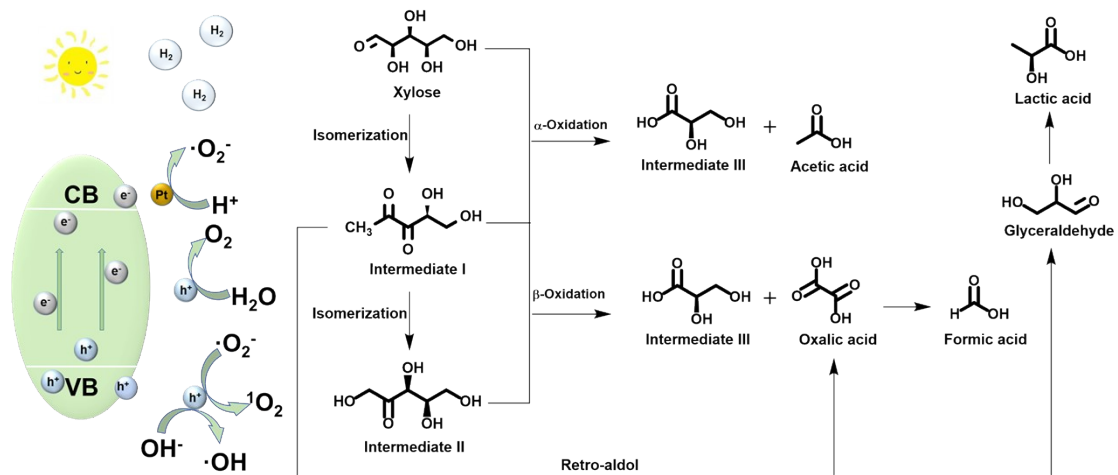

**Fig. S7** The possible reaction pathway of co-production of hydrogen and lactic acid from xylose over RuP<sub>2</sub>/Ti<sub>4</sub>P<sub>6</sub>O<sub>23</sub>@TiO<sub>2</sub>-7.

**Table S1.** The effects of different TiO<sub>2</sub>-based materials on the hydrogen evolution

| Photocatalysis                                                                                     | Reaction conditions                  | Hydrogen evolution<br>( $\mu\text{mol g}^{-1} \text{h}^{-1}$ ) | Ref.      |
|----------------------------------------------------------------------------------------------------|--------------------------------------|----------------------------------------------------------------|-----------|
| RuP <sub>2</sub> /Ti <sub>4</sub> P <sub>6</sub> O <sub>23</sub> @TiO <sub>2</sub> -7 <sup>a</sup> | Xylose (5 mg/ml),<br>Visible-light   | 16269.2                                                        | This work |
| WO <sub>3</sub> /TiO <sub>2</sub> /rGO <sup>b</sup>                                                | methanol, = 365 nm                   | 245.8                                                          | [1]       |
| TiO <sub>2</sub> /ZnS-5 <sup>c</sup>                                                               | TAOH, Visible-light                  | 5503.8                                                         | [2]       |
| Co <sub>2</sub> P/TiO <sub>2</sub> <sup>d</sup>                                                    | methanol, Visible-light              | 409.5                                                          | [3]       |
| (CCT) Carbon dots/g-C <sub>3</sub> N <sub>4</sub> /TiO <sub>2</sub> <sup>e</sup>                   | Triethanolamine, > 420 nm            | 580.0                                                          | [4]       |
| CdS/Ag/TiO <sub>2</sub> <sup>f</sup>                                                               | Na <sub>2</sub> S solution, > 420 nm | 806.3                                                          | [5]       |

Reaction conditions: <sup>a</sup> 30.0 °C, 6 h; <sup>b</sup> 50 mg, 3 h; <sup>c</sup> 3 h; <sup>d</sup> 4 h; <sup>e</sup> 50 mg, 3 h; <sup>f</sup> 3.5 h;

## References

- 1 F. He, A. Meng, B. Cheng, W. Ho and J. Yu, *Chinese J. Catal.*, 2020, **41**, 9-20.
- 2 Q. Wang, G. Wang, J. Wang, J. Li, K. Wang, S. Zhou and Y. Su, *Adv. Sustain. Syst.*, 2022, **11**, 2200027.
- 3 W. Ding, X. Zhang, Q. Wang, X. Jiang, L. Xiao and H. Du, *Energy Technol-ger.*, 2022, **10**, 2200059.
- 4 Z. Hu, D. Shi, G. Wang, T. Gao, J. Wang, L. Lu and J. Li, *Appl. Surf. Sci.*, 2022, **601**, 154167.
- 5 X. Xu, T. Wang, M. Xu, X. Yang, J. Hou, D. Cao and Q. Wang, *Spectrochim. Acta A.*, 2022, **276**, 121215.
